# Supplementary material for: Systematical identifications of prognostic meaningful lung adenocarcinoma subtypes and the underlying mutational and expressional characters
Source: Springer Nature journal article supplement (doi:10.1186/s12885-019-6462-y), 2020-01-27

A

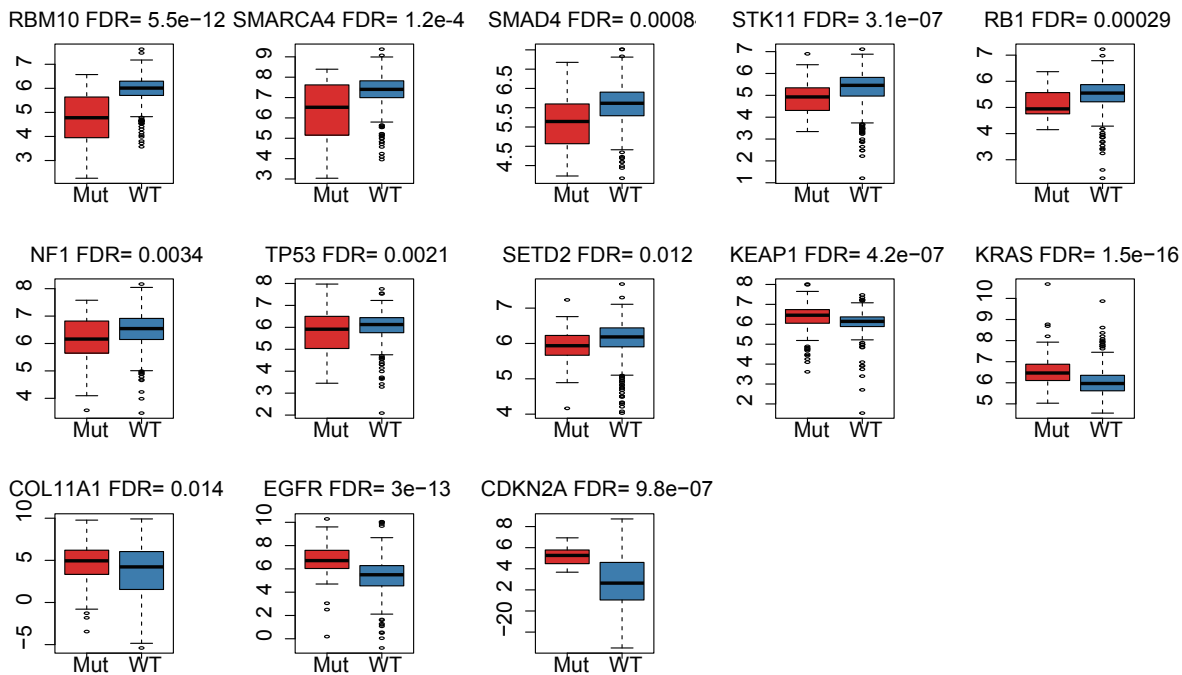

B

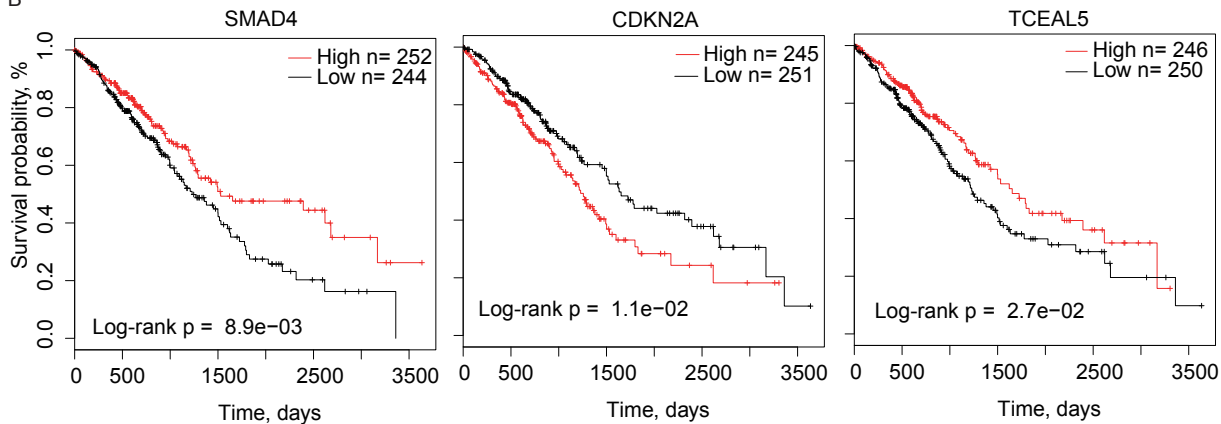

Supplement: MOESM1 [file 17611040]
