# Supplementary material for: Systematical identifications of prognostic meaningful lung adenocarcinoma subtypes and the underlying mutational and expressional characters
Source: Springer Nature journal article supplement (doi:10.1186/s12885-019-6462-y), 2020-01-27
Supplement: MOESM3 [file 17611040]

Accuracy Leave-One-Out Cross-Validation

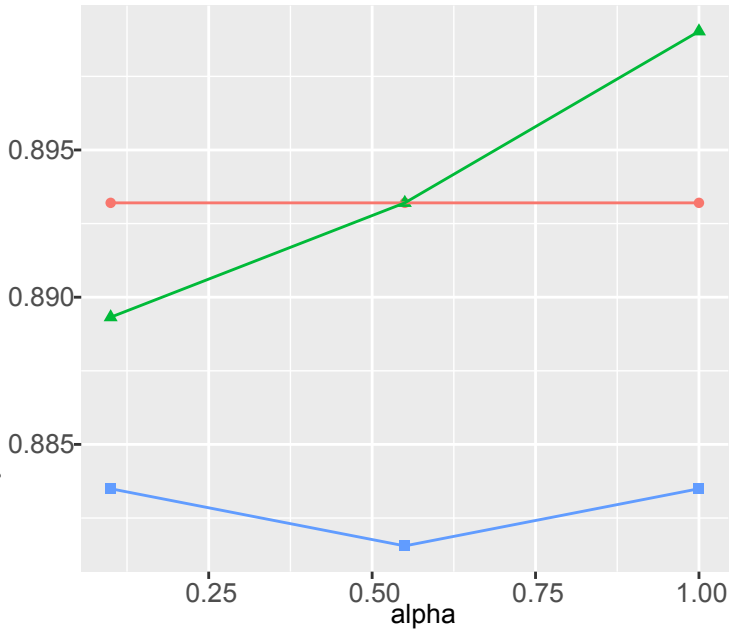

lambda

0.0007137788

0.0071377880

0.0713778800
